# Supplementary material for: Development, Validation, and Two-Year Application of Rapid and Simple LC-MS/MS-Based Method for the Determination of K2MK-7 in Blood Samples
Source: MDPI journal article supplement (doi:10.3390/molecules28186523), 2023-09-08
Supplement: s1 [file s1]

*Supplementary Materials*

# **Development, Validation, and Two-Year Application of Rapid and Simple LC-MS/MS-Based Method for the Determination of K2MK-7 in Blood Samples**

**Łukasz Paprotny , Dorota Szewczak , Iryna Bryshten and Dorota Wianowska**

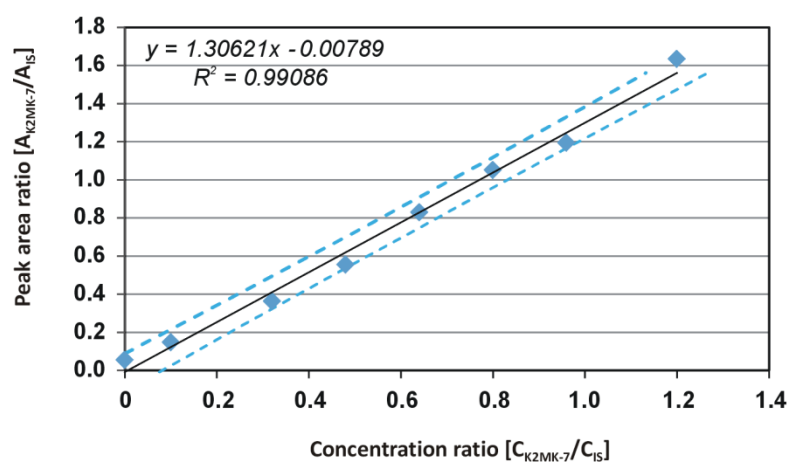

Figure S1. Calibration curve with marked confidence intervals at the confidence level 0.95.

Table S1. Raw data for calibration curve together with statistical analysis

[illegible]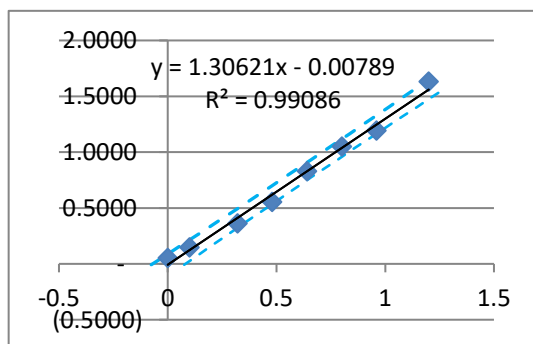[illegible]

|    |      |          |       |          |          |
|----|------|----------|-------|----------|----------|
| 5  | 0,3  | 0,383969 | 0,032 | 0,23371  | 0,36629  |
| 6  | 0,36 | 0,462341 | 0,031 | 0,295112 | 0,424888 |
| 7  | 0,42 | 0,540714 | 0,031 | 0,356325 | 0,483675 |
| 8  | 0,48 | 0,619086 | 0,030 | 0,41734  | 0,54266  |
| 9  | 0,54 | 0,697459 | 0,030 | 0,478147 | 0,601853 |
| 10 | 0,6  | 0,775831 | 0,030 | 0,538737 | 0,661263 |
| 11 | 0,66 | 0,854204 | 0,029 | 0,599104 | 0,720896 |
| 12 | 0,72 | 0,932576 | 0,029 | 0,659245 | 0,780755 |
| 13 | 0,78 | 1,010949 | 0,029 | 0,719157 | 0,840843 |
| 14 | 0,84 | 1,089322 | 0,030 | 0,778841 | 0,901159 |
| 15 | 0,9  | 1,167694 | 0,030 | 0,838301 | 0,961699 |
| 16 | 0,96 | 1,246067 | 0,030 | 0,897543 | 1,022457 |
| 17 | 1,02 | 1,324439 | 0,031 | 0,956575 | 1,083425 |
| 18 | 1,08 | 1,402812 | 0,031 | 1,015406 | 1,144594 |
| 19 | 1,14 | 1,481184 | 0,032 | 1,074046 | 1,205954 |
| 20 | 1,2  | 1,559557 | 0,033 | 1,132508 | 1,267492 |

4

Table S2. The lack-of-fit test

H<sub>0</sub> There is no lack of fit

H<sub>A</sub> There is lack of fit

| Concentration | Signal 1  | Signal 2  | Signal 3 | Mean<br>signal | Signal_calc<br>(au) | (mean-<br>calculated)^2 | MSS (LoF) | (Signal1(i)-<br>mean_signal(i))^2 | (Signal2(i)-<br>mean_signal(i))^2 | (Signal3(i)-<br>mean_signal(i))^2 | MSS (error) |
|---------------|-----------|-----------|----------|----------------|---------------------|-------------------------|-----------|-----------------------------------|-----------------------------------|-----------------------------------|-------------|
| 0             | 0,0520775 | 0,0672389 | 0,052852 | 0,0574         | -0,0079             | 0,004262                | 0,00515   | 0,0000282                         | 0,0000970                         | 0,0000206                         | 0,010184    |
| 0,1           | 0,145376  | 0,152094  | 0,140187 | 0,1459         | 0,1227              | 0,000536                |           | 0,0000003                         | 0,0000385                         | 0,0000325                         |             |
| 0,32          | 0,387264  | 0,286261  | 0,412377 | 0,3620         | 0,4101              | 0,002316                |           | 0,0006399                         | 0,0057314                         | 0,0025411                         |             |
| 0,48          | 0,598249  | 0,378097  | 0,507398 | 0,4946         | 0,6191              | 0,015501                |           | 0,0107470                         | 0,0135686                         | 0,0001643                         |             |
| 0,64          | 0,746753  | 0,974228  | 0,762835 | 0,8279         | 0,8281              | 0,000000                |           | 0,0065911                         | 0,0214006                         | 0,0042385                         |             |
| 0,8           | 1,02827   | 1,07562   | 1,0422   | 1,0487         | 1,0371              | 0,000135                |           | 0,0004172                         | 0,0007249                         | 0,0000422                         |             |
| 0,96          | 1,41577   | 1,08118   | 1,08012  | 1,1924         | 1,2461              | 0,002885                |           | 0,0499135                         | 0,0123603                         | 0,0125971                         |             |
| 1,2           | 1,7325    | 1,52746   | 1,63682  | 1,6323         | 1,5596              | 0,005286                |           | 0,0100481                         | 0,0109830                         | 0,0000208                         |             |

slope 1,3062094

intercept -0,0078943

n 8

p 3

DoF (numerator)= 7

DoF (denominator)= 18

F<sub>tab</sub>= 2,58

F<sub>calc</sub>= 0,790

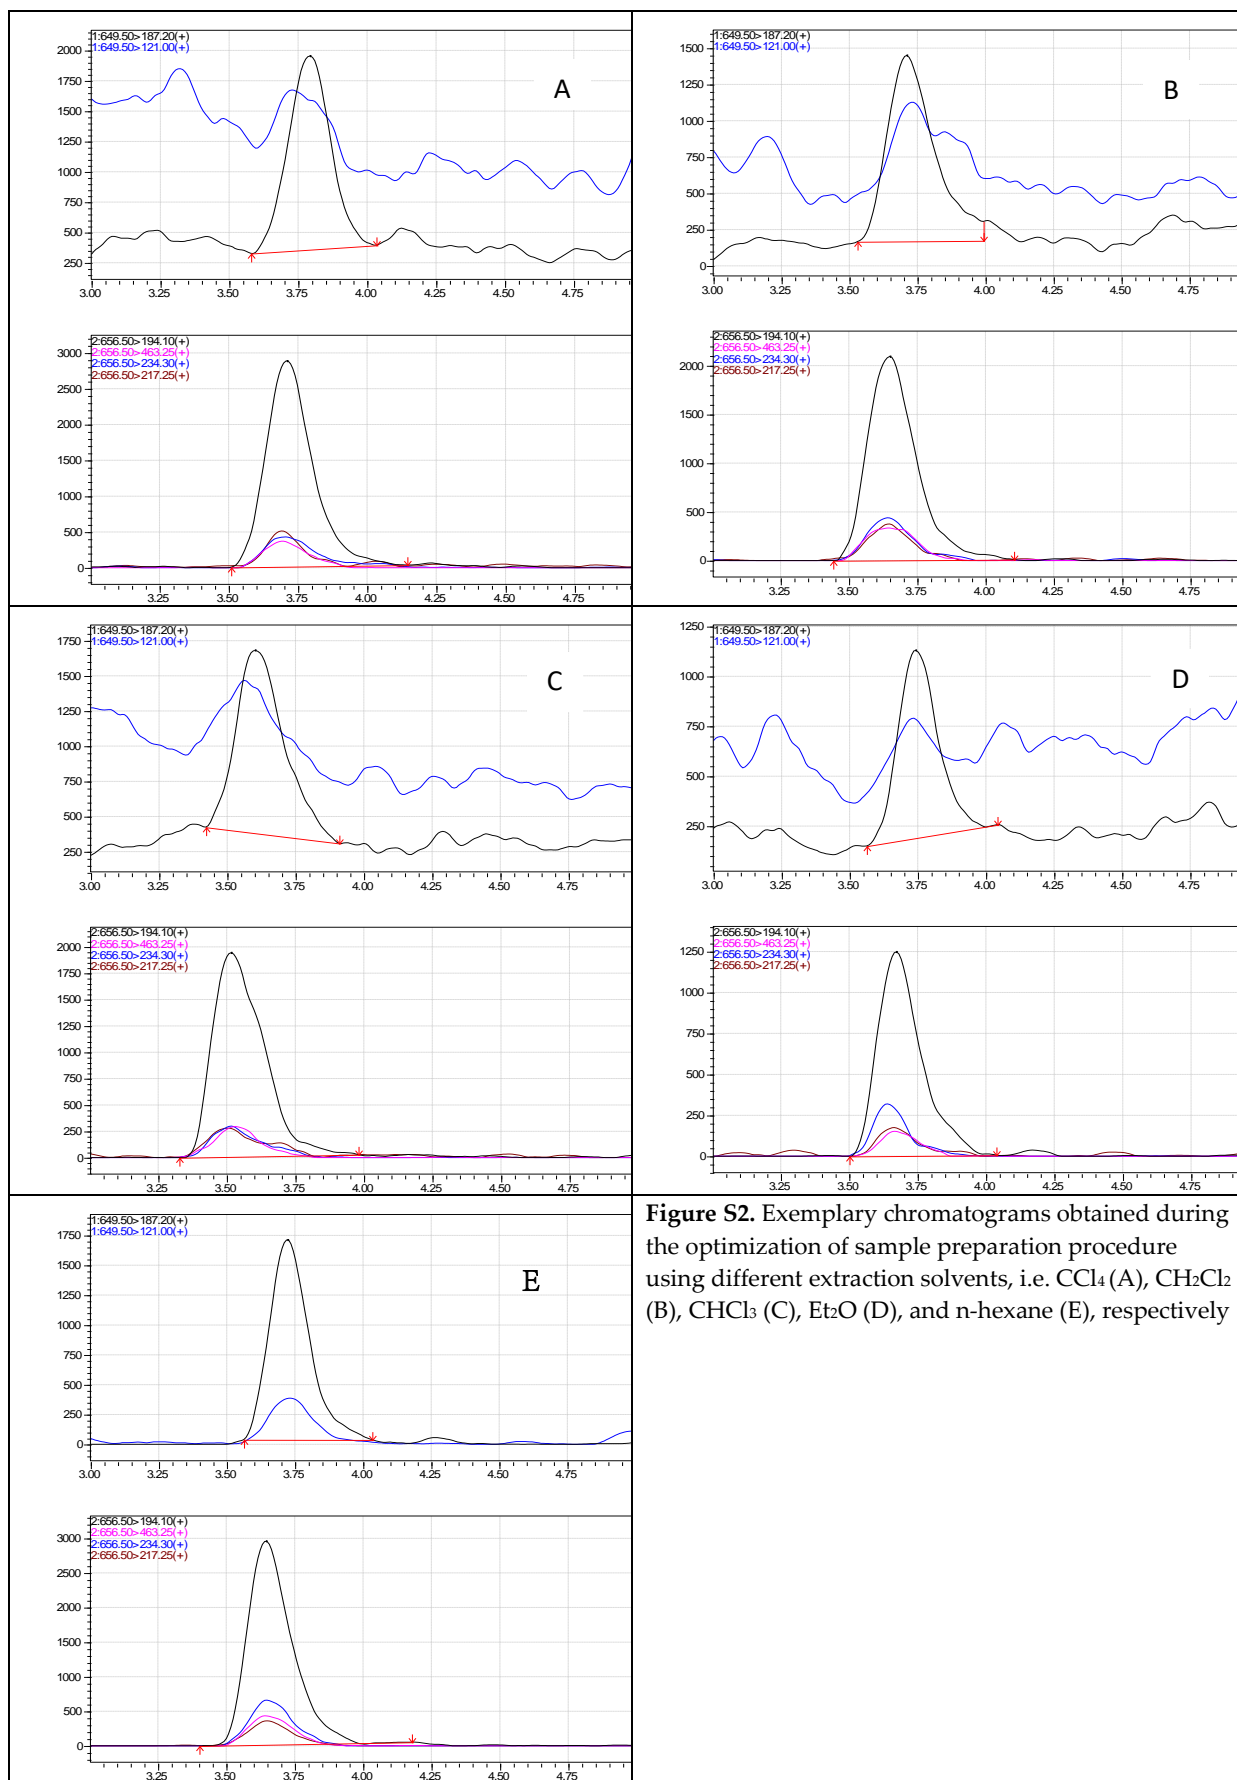

**Figure S2.** Exemplary chromatograms obtained during the optimization of sample preparation procedure using different extraction solvents, i.e. CCl<sub>4</sub> (A), CH<sub>2</sub>Cl<sub>2</sub> (B), CHCl<sub>3</sub> (C), Et<sub>2</sub>O (D), and n-hexane (E), respectively

Table S3. The influence of the number of extraction cycles on the surface area of the vitamin K2MK-7 peak extracted using 500 and 250  $\mu$ L of n-hexane, respectively

| Cycle number | 500 $\mu$ L      | 250 $\mu$ L      |
|--------------|------------------|------------------|
| 1            | 31194 $\pm$ 674  | 19071 $\pm$ 622  |
| 2            | 1940 $\pm$ 483   | 7247 $\pm$ 1141  |
| 3            | n.d.             | 6371 $\pm$ 701   |
| Total        | 33134 $\pm$ 1157 | 32689 $\pm$ 2464 |

Table S4. Results of comparative studies

| Sample number | Lab 1   | Lab 2   |
|---------------|---------|---------|
| 1             | 1,3412  | 1,1467  |
| 2             | 2,6195  | 2,3838  |
| 3             | 0,2842  | 0,2473  |
| 4             | 0,4484  | 0,4874  |
| 5             | 0,4441  | 0,3819  |
| 6             | 0,1461  | 0,1242  |
| 7             | 3,6302  | 3,0494  |
| 8             | 0,1585  | 0,1426  |
| 9             | 0,3492  | 0,3212  |
| 10            | 3,2486  | 3,6501  |
| 11            | 0,1400  | 0,1246  |
| 12            | 11,6607 | 10,4946 |
| 13            | 9,8915  | 8,9024  |
| 14            | 0,5110  | 0,4343  |
| 15            | 0,1012  | 0,1205  |
| 16            | 0,2309  | 0,1986  |
| 17            | 1,1451  | 0,9963  |
| 18            | 1,9074  | 1,8120  |
| 19            | 0,4140  | 0,3560  |
| 20            | 0,3700  | 0,3145  |
| 21            | 0,1470  | 0,1279  |
| 22            | 0,8100  | 0,7290  |
| 23            | 0,2026  | 0,1732  |
| 24            | 1,4940  | 1,3595  |
| 25            | 2,9381  | 3,3771  |
| 26            | 2,7799  | 2,5575  |
| 27            | 0,6037  | 0,5192  |
| 28            | 2,3655  | 2,0107  |
| 29            | 0,4067  | 0,3416  |
| 30            | 0,1474  | 0,1327  |
| 31            | 0,2588  | 0,2381  |
| 32            | 0,3824  | 0,4297  |

|    |        |        |
|----|--------|--------|
| 33 | 0,0815 | 0,0725 |
| 34 | 0,1424 | 0,1282 |
| 35 | 2,1365 | 1,9229 |
| 36 | 0,3816 | 0,3244 |
| 37 | 0,7482 | 0,6285 |
| 38 | 0,6977 | 0,8113 |
| 39 | 0,3426 | 0,3938 |
| 40 | 0,1617 | 0,1536 |
| 41 | 3,6728 | 3,1586 |
| 42 | 2,7141 | 3,1930 |
| 43 | 2,6850 | 2,3360 |
| 44 | 1,9942 | 1,7948 |
| 45 | 1,5802 | 1,3511 |
| 46 | 0,2022 | 0,2222 |
| 47 | 1,7170 | 1,4938 |
| 48 | 2,2546 | 2,0742 |
| 49 | 0,1250 | 0,1075 |
| 50 | 3,1480 | 3,7035 |
